# Supplementary material for: Rapid solvo-microwave annealing for optimizing ordered nanostructures and crystallization of regioregular polythiophene-based block copolymers
Source: Royal Society of Chemistry journal article supplement (doi:10.1039/c9py00871c), 2019-01-01
Supplement: c9py00871c1.pdf [file c9py00871c1.pdf]

## Supporting Information

# **Rapid Solvo-Microwave Annealing for Optimizing Ordered Nanostructures and Crystallization of Regioregular Polythiophene-Based Block Copolymers†**

*Junghun Han<sup>a</sup>, Jin-Seong Kim<sup>a</sup>, Jae Man Shin<sup>a</sup>, Hongseok Yun<sup>a</sup>, Youngkwon Kim<sup>a</sup>, Hyeonjung Park<sup>a</sup>, Bumjoon J. Kim<sup>\*a</sup>*

<sup>a</sup> Department of Chemical and Biomolecular Engineering, Korea Advanced Institute of Science and Technology (KAIST), Daejeon 34141, Republic of Korea

\*E-mail: bumjoonkim@kaist.ac.kr (B. J. K.)

## Table of contents

### Supplementary Table S1

- Crystalline characteristics of P3DDT in P3DDT-*b*-PLA (0.48) thin films

### Supplementary Fig. S1-7

- SEC traces of P3DDT-alkyne, P3DDT-*b*-PLA (0.48) and P3DDT-*b*-PLA (0.24) S1
- TEM images and corresponding FFT images of P3DDT-*b*-PLA (0.24) thin films. The images represent the degree of ordering according to annealing methods: (a) As-spun-cast, (b) thermal annealing followed by fast-quenching, (c) thermal annealing followed by slow cooling and (d) solvo-microwave annealing. P3DDT domains appear dark due to RuO<sub>4</sub> vapor staining. The scale bars are 100 nm. S2
- TEM images of solvent annealed thin films : (a) P3DDT-*b*-PLA (0.48) and (b) P3DDT-*b*-PLA (0.24) S3
- TEM images of P3DDT-*b*-PLA (0.24) thin film prepared by solvo-microwave annealing with different temperatures and times. The scale bars are 100 nm. S4
- 2D GISAXS images of P3DDT-*b*-PLA (0.48) thin films prepared by (a) thermal annealing (fast-quenching), (b) thermal annealing (slow-cooling) and (c) solvo-microwave annealing. S5
- GISAXS in-plane plot of P3DDT-*b*-PLA (0.24) thin film prepared by thermal annealing (fast-quenched and slowly-cooled) and solvo-microwave annealing. S6
- GIWAXS (a) out of plane and (b) in-plane plots of P3DDT-*b*-PLA (0.48) thin films prepared by thermal annealing (fast-quenched and slowly-cooled) and solvo-microwave annealing S7



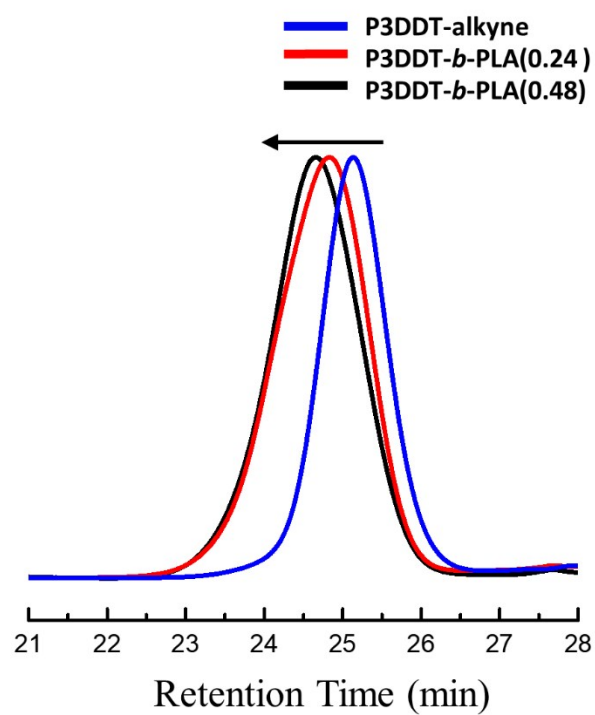

**Fig. S1** SEC traces of P3DDT-alkyne, P3DDT-*b*-PLA (0.48) and P3DDT-*b*-PLA (0.24)

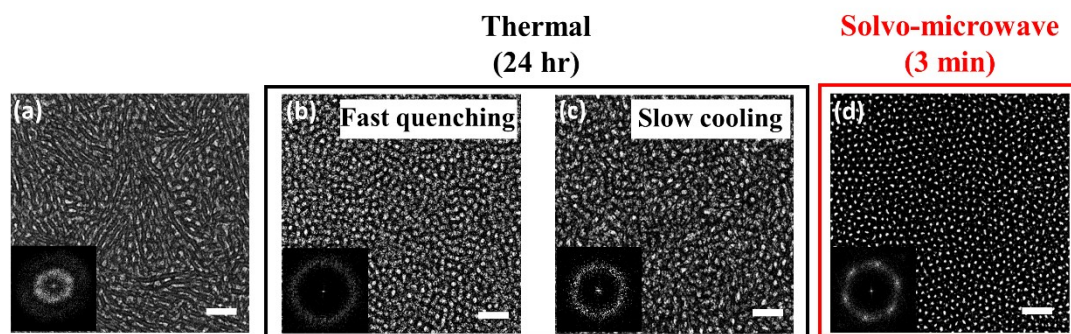

**Fig. S2** TEM images and corresponding FFT images of P3DDT-*b*-PLA (0.24) thin films. The images represent the degree of ordering according to annealing methods: (a) As-spuncast, (b) thermal annealing followed by fast-quenching, (c) thermal annealing followed by slow cooling and (d) solvo-microwave annealing. P3DDT domains appear dark due to RuO<sub>4</sub> vapor staining. The scale bars are 100 nm.

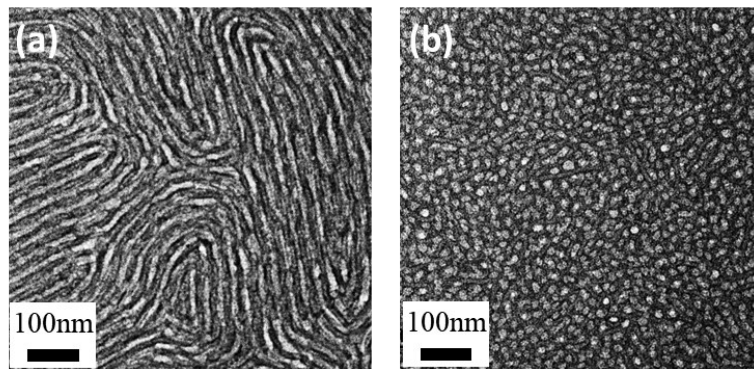

**Fig. S3** TEM images of solvent annealed thin films : (a) P3DDT-*b*-PLA (0.48) and (b) P3DDT-*b*-PLA (0.24)

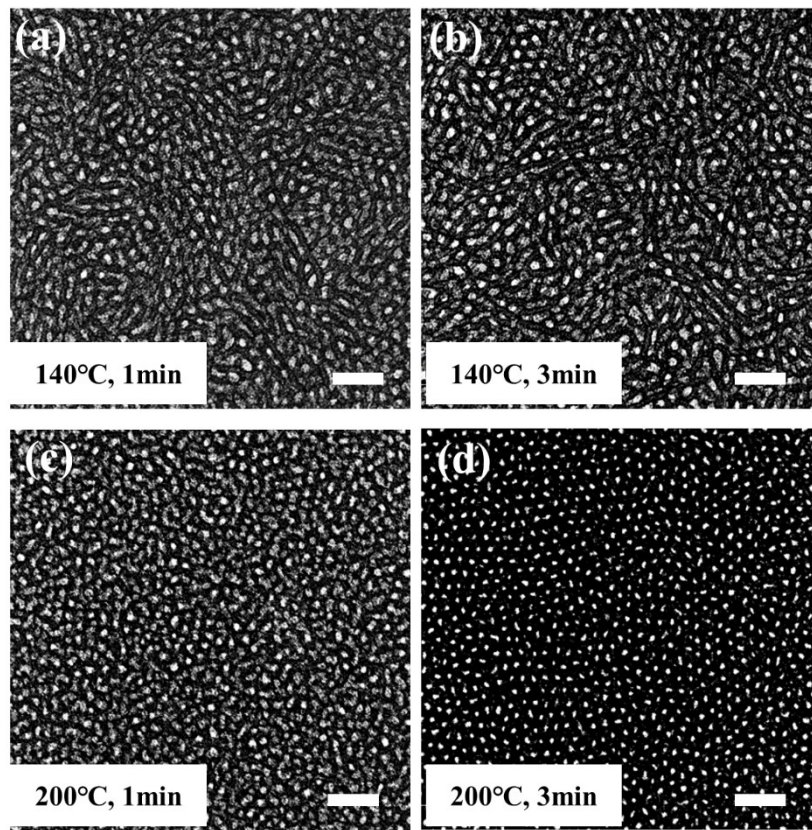

**Fig. S4** TEM images of P3DDT-*b*-PLA (0.24) thin film prepared by solvo-microwave annealing with different temperatures and times. The scale bars are 100 nm.

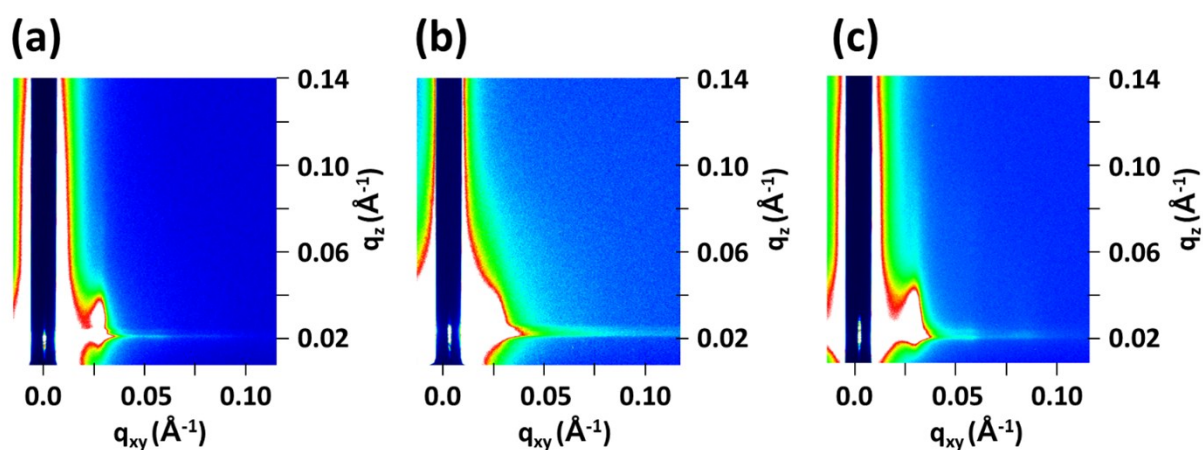

**Fig. S5** 2D GISAXS images of P3DDT-*b*-PLA (0.48) thin films prepared by (a) thermal annealing (fast-quenching), (b) thermal annealing (slow-cooling) and (c) solvo-microwave annealing.



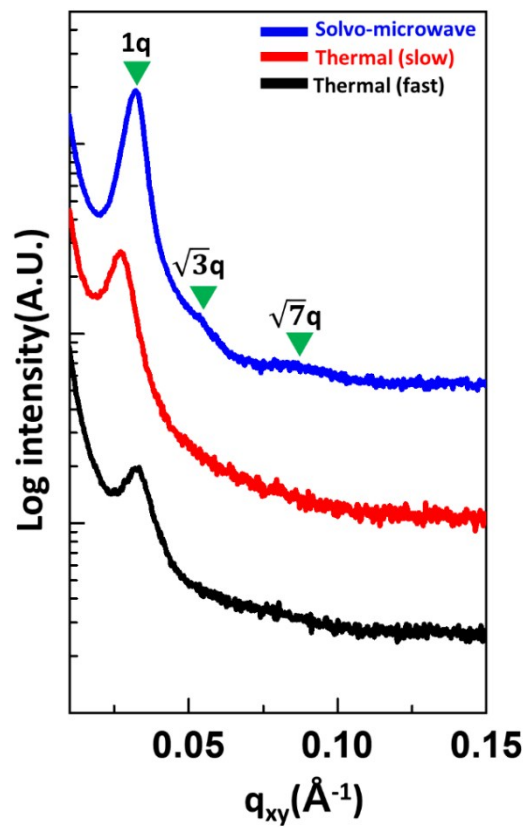

**Fig. S6** GISAXS in-plane plot of P3DDT-*b*-PLA (0.24) thin film prepared by thermal annealing (fast-quenched and slowly-cooled) and solvo-microwave annealing.

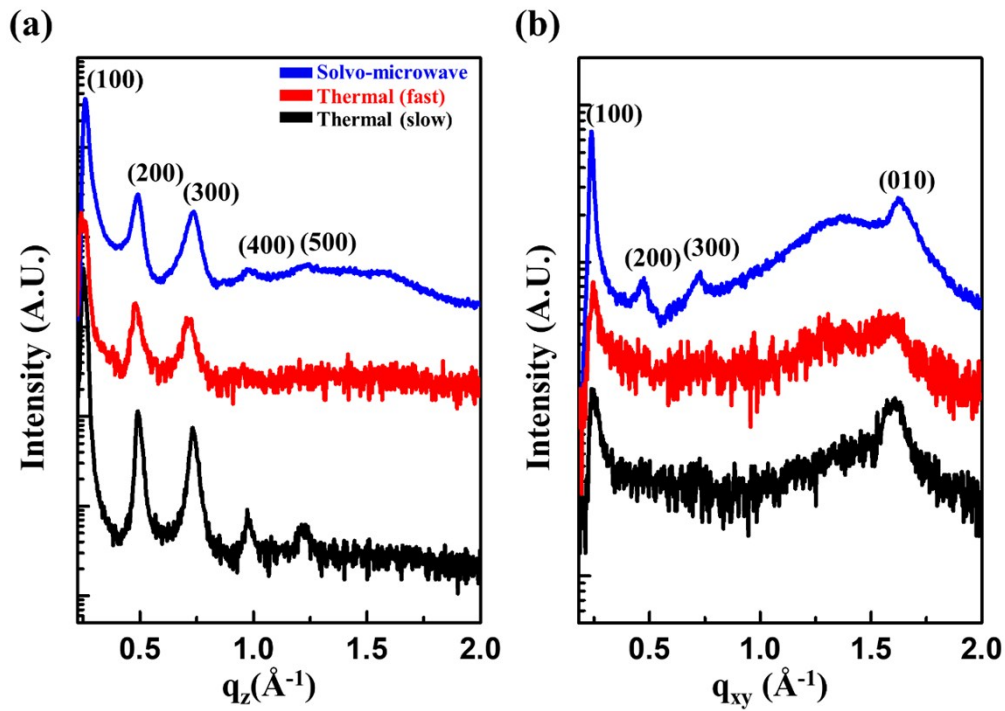

**Fig. S7** GIWAXS (a) out of plane and (b) in-plane plots of P3DDT-*b*-PLA (0.48) thin films prepared by thermal annealing (fast-quenched and slowly-cooled) and solvo-microwave annealing

**Table S1.** Crystalline characteristics of P3DDT in P3DDT-*b*-PLA (0.48) thin films

| Polymer                    | Annealing method         | FWHM <sub>(200)</sub> (Å <sup>-1</sup> ) | FWHM <sub>(010)</sub> (Å <sup>-1</sup> ) | L <sub>c(200)</sub> (Å) | L <sub>c(010)</sub> (Å) | g <sub>(010)</sub> (%) |
|----------------------------|--------------------------|------------------------------------------|------------------------------------------|-------------------------|-------------------------|------------------------|
| P3DDT- <i>b</i> -PLA(0.48) | Thermal (fast-quenching) | 0.041                                    | 0.551                                    | 147                     | 10                      | 24                     |
|                            | Thermal (slow-cooling)   | 0.027                                    | 0.113                                    | 209                     | 49                      | 11                     |
|                            | Solvo-microwave          | 0.031                                    | 0.103                                    | 183                     | 55                      | 10                     |
